# Supplementary material for: Novel mechanisms of Collagenase Santyl Ointment (CSO) in wound macrophage polarization and resolution of wound inflammation
Source: PubMed Central journal article supplement (PMC5786052; doi:10.1038/s41598-018-19879-w), 2018-01-26
Supplement: 41598_2018_19879_MOESM1_ESM.pdf [file 41598_2018_19879_MOESM1_ESM.pdf]

# **NOVEL MECHANISMS OF COLLAGENASE SANTYL OINTMENT (CSO) IN WOUND MACROPHAGE POLARIZATION AND RESOLUTION OF WOUND INFLAMMATION**

Amitava Das<sup>1†</sup>, Soma Datta<sup>1†</sup>, Eric Roche<sup>2</sup>, Scott Chaffee<sup>1</sup>, Elizabeth Jose<sup>1</sup>, Lei Shi<sup>2</sup>, Komel Grover<sup>2</sup>, Savita Khanna<sup>1</sup>, Chandan K. Sen<sup>1</sup> and Sashwati Roy<sup>1\*</sup>

<sup>1</sup>Department of Surgery, Center for Regenerative Medicine and Cell Based Therapies and Comprehensive Wound Center, The Ohio State University Wexner Medical Center, Columbus, OH, 43210, USA

<sup>2</sup>Research & Development, Smith & Nephew, Inc., Fort Worth, Texas, USA

<sup>†</sup>equally contributed to work

**Running Title:** Collagenase in resolution of inflammation

## **Address correspondence to:**

Sashwati Roy, PhD

473 West 12th Avenue, 511 DHLRI

The Ohio State University Medical Center

Columbus, Ohio 43210

Tel. 614 247 7658; Fax 614 247 7818

E.mail: sashwati.roy@osumc.edu

# SUPPLEMENTARY FIGURES

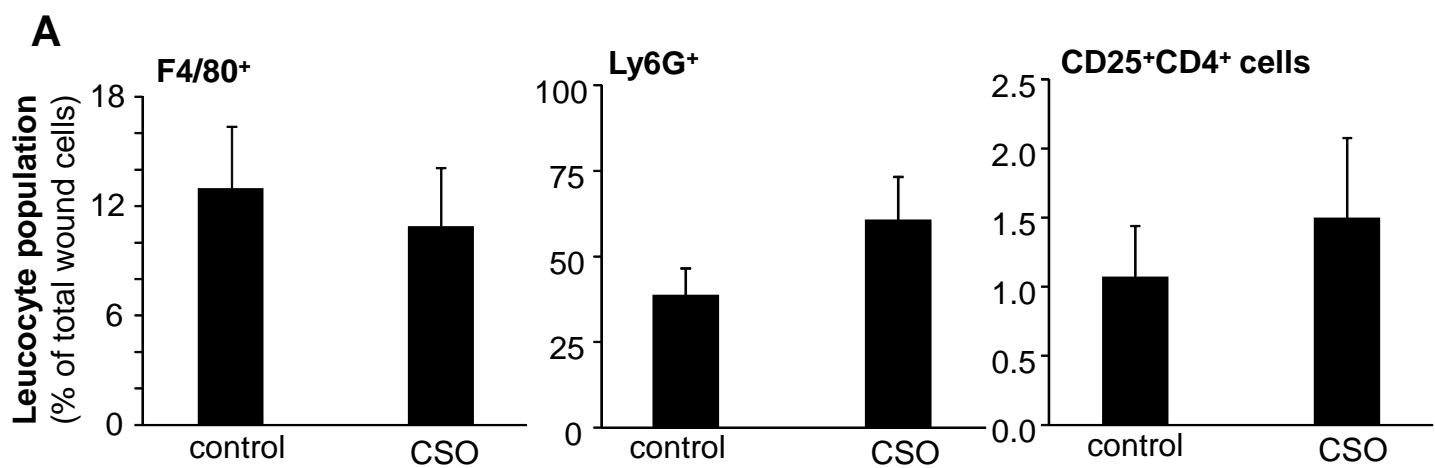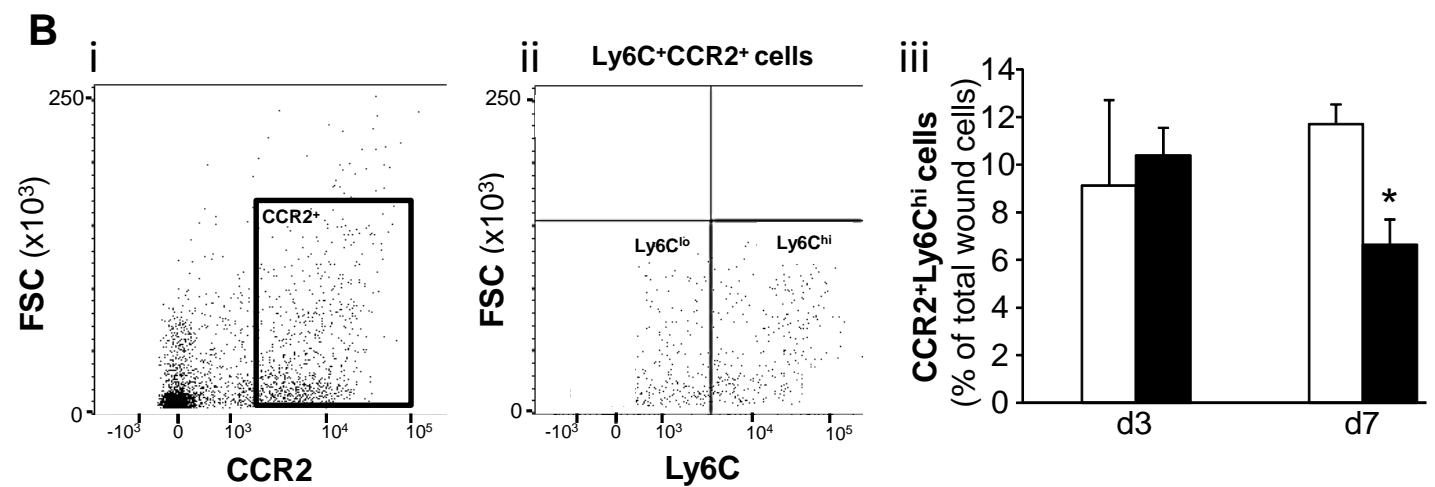

**Figure S1**

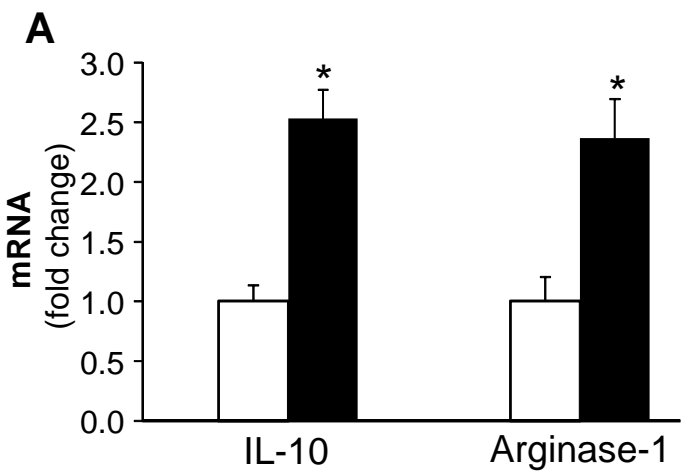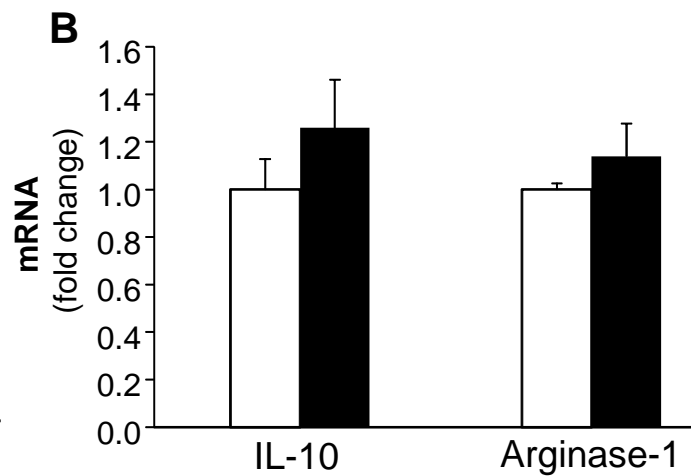

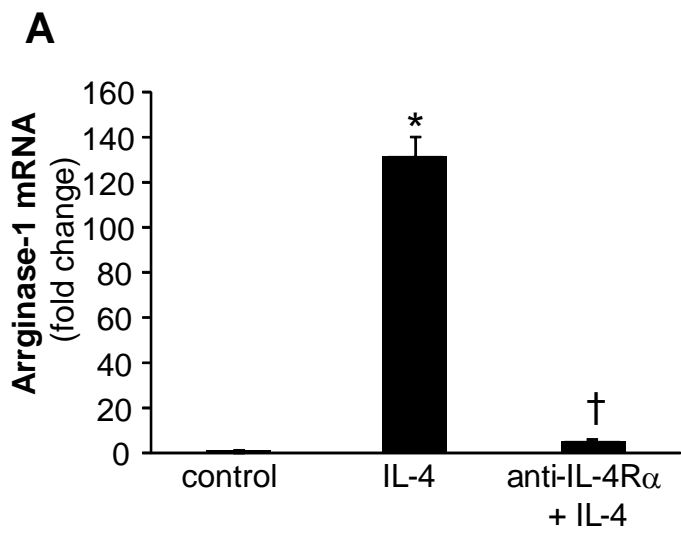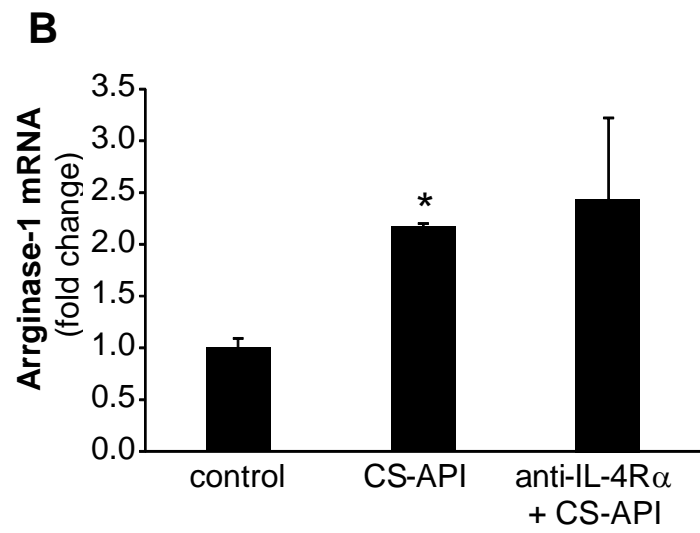

Figure S6

## Supplementary Figures.

### Figure S1. Flow cytometry analysis of wound cell populations following CSO

**treatment.** Wound cells were harvested from PVA sponges coated with CSO (300 mg), implanted subcutaneously in C57bl/6 mice and were immunostained with leukocyte markers and subjected to flow cytometry analysis. **(A)** d7 leukocyte populations F4/80<sup>+</sup>, Ly6G<sup>+</sup> and CD25<sup>+</sup>CD4<sup>+</sup> were quantified from the gated cell populations. **(B)** d3 and d7 populations of CCR2<sup>+</sup>Ly6C<sup>hi</sup> cells. i) CCR2<sup>+</sup> (PE positive) cells were gated against relevant IgG control; ii) scatter blot analysis of Ly6C<sup>+</sup>/CCR2<sup>+</sup> gated cells to determine the expression Ly6C<sup>hi</sup> or Ly6C<sup>lo</sup> cells. iii) quantification of cells shown in ii. CSO, solid bars; control, blank bars. Data are mean  $\pm$  SEM (n = 5-8); \* $p$ <0.05 compared to d7 wound m $\phi$  treated with equal amounts of white petrolatum (control).

### Figure S2. CSO induces macrophage polarization to a pro-resolving phenotype in human blood monocyte derived macrophages (hMDM) but not in pro-resolving (M

**IL-4) polarized hMDM. A.** hMDM were treated with CS-API (250ng/ml) for 24h. Total RNA was isolated and IL-10 and Arginase-1 mRNA expression was measured using RTPCR. Data are expressed as mean  $\pm$  SEM (n=4). \* $p$ <0.05 compared to control. **B.** hMDM were polarized to pro-resolving {M(IL-4)} macrophages using IL-4 (20ng/ml) and IL-13 (20ng/ml) for 48h and then treated with CS-API (250ng/ml) for 24h. Total RNA was isolated and mRNA expression of IL-10 and Arginase-1 was measured using RTPCR. CSO, solid bars; control, blank bars. Data are expressed as mean  $\pm$  SEM (n=4). \* $p$ <0.05 compared to control.

**Figure S6. CS-API mediated macrophage polarization is independent of classical IL4- IL4R activation pathway.** Cultured mouse m $\phi$  were treated with IL-4R- $\alpha$  neutralizing antibody (10 $\mu$ g/ml) for 1 hour followed by **(A)** IL-4 (20ng/ml) or **(B)** CS-API (250 ng/mL) treatment for 24 hours. Arginase-1 mRNA expression was measured using RTPCR. Data are expressed as mean  $\pm$  SEM ( $n=3$ ); \* $p<0.05$  compared to control, † $p<0.05$ , compared to IL-4 treated group.
